# Supplementary material
Source: ML conference proceedings conference paper supplement (https://proceedings.neurips.cc/paper_files/paper/2017/hash/bbeb0c1b1fd44e392c7ce2fdbd137e87-Abstract.html)
Supplement: Supplementary file [file bbeb0c1b1fd44e392c7ce2fdbd137e87-Supplemental.zip]

# Triangle Generative Adversarial Networks: Supplementary Material

Zhe Gan\*, Liquan Chen\*, Weiyao Wang, Yunchen Pu, Yizhe Zhang,  
Hao Liu, Chunyuan Li, Lawrence Carin  
Duke University  
zhe.gan@duke.edu

## A Detailed theoretical analysis

**Proposition 1.** For any fixed generator  $G_x$  and  $G_y$ , the optimal discriminator  $D_1$  and  $D_2$  of the game defined by the value function  $V(G_x, G_y, D_1, D_2)$  is

$$D_1^*(x, y) = \frac{p(x, y)}{p(x, y) + p_x(x, y) + p_y(x, y)}, \quad D_2^*(x, y) = \frac{p_x(x, y)}{p_x(x, y) + p_y(x, y)}.$$

*Proof.* The training criterion for the discriminator  $D_1$  and  $D_2$ , given any generator  $G_x$  and  $G_y$ , is to maximize the quantity  $V(G_x, G_y, D_1, D_2)$ :

$$\begin{aligned} V(G_x, G_y, D_1, D_2) &= \int_x \int_y p(x, y) \log D_1(x, y) dx dy + \int_x \int_y p_x(x, y) \log(1 - D_1(x, y)) dx dy \\ &\quad + \int_x \int_y p_x(x, y) \log D_2(x, y) dx dy + \int_x \int_y p_y(x, y) \log(1 - D_2(x, y)) dx dy \\ &\quad + \int_x \int_y p_y(x, y) \log(1 - D_2(x, y)) dx dy. \end{aligned}$$

Following [1], for any  $(a, b) \in \mathbb{R}^2 \setminus \{0, 0\}$ , the function  $y \rightarrow a \log y + b \log(1 - y)$  achieves its maximum in  $[0, 1]$  at  $\frac{a}{a+b}$ . This concludes the proof.  $\square$

**Proposition 2.** The equilibrium of  $V(G_x, G_y, D_1, D_2)$  is achieved if and only if  $p(x, y) = p_x(x, y) = p_y(x, y)$  with  $D_1^*(x, y) = \frac{1}{3}$  and  $D_2^*(x, y) = \frac{1}{2}$ , and the optimum value is  $-3 \log 3$ .

*Proof.* Given the optimal  $D_1^*(x, y)$  and  $D_2^*(x, y)$ , the minimax game can be reformulated as:

$$C(G_x, G_y) = \max_{D_1, D_2} V(G_x, G_y, D_1, D_2) \tag{1}$$

$$= \mathbb{E}_{(x, y) \sim p(x, y)} \left[ \log \frac{p(x, y)}{p(x, y) + p_x(x, y) + p_y(x, y)} \right] \tag{2}$$

$$+ \mathbb{E}_{(x, y) \sim p_x(x, y)} \left[ \log \frac{p_x(x, y)}{p(x, y) + p_x(x, y) + p_y(x, y)} \right] \tag{3}$$

$$+ \mathbb{E}_{(x, y) \sim p_y(x, y)} \left[ \log \frac{p_y(x, y)}{p(x, y) + p_x(x, y) + p_y(x, y)} \right]. \tag{4}$$

---

\* Equal contribution.

Note that

$$C(G_1, G_2) = -3 \log 3 + KL\left(p(\mathbf{x}, \mathbf{y}) \left\| \frac{p(\mathbf{x}, \mathbf{y}) + p_x(\mathbf{x}, \mathbf{y}) + p_y(\mathbf{x}, \mathbf{y})}{3}\right.\right) \quad (5)$$

$$+ KL\left(p_x(\mathbf{x}, \mathbf{y}) \left\| \frac{p(\mathbf{x}, \mathbf{y}) + p_x(\mathbf{x}, \mathbf{y}) + p_y(\mathbf{x}, \mathbf{y})}{3}\right.\right) \quad (6)$$

$$+ KL\left(p_y(\mathbf{x}, \mathbf{y}) \left\| \frac{p(\mathbf{x}, \mathbf{y}) + p_x(\mathbf{x}, \mathbf{y}) + p_y(\mathbf{x}, \mathbf{y})}{3}\right.\right). \quad (7)$$

Therefore,

$$C(G_1, G_2) = -3 \log 3 + 3 \cdot JSD\left(p(\mathbf{x}, \mathbf{y}), p_x(\mathbf{x}, \mathbf{y}), p_y(\mathbf{x}, \mathbf{y})\right) \geq -3 \log 3, \quad (8)$$

where  $JSD_{\pi_1, \dots, \pi_n}(p_1, p_2, \dots, p_n) = H\left(\sum_{i=1}^n \pi_i p_i\right) - \sum_{i=1}^n \pi_i H(p_i)$  is the Jensen-Shannon divergence.  $\pi_1, \dots, \pi_n$  are weights that are selected for the probability distribution  $p_1, p_2, \dots, p_n$ , and  $H(p)$  is the entropy for distribution  $p$ . In the three-distribution case described above, we set  $n = 3$  and  $\pi_1 = \pi_2 = \pi_3 = \frac{1}{3}$ .

For  $p(\mathbf{x}, \mathbf{y}) = p_x(\mathbf{x}, \mathbf{y}) = p_y(\mathbf{x}, \mathbf{y})$ , we have  $D_1^*(\mathbf{x}, \mathbf{y}) = \frac{1}{3}$ ,  $D_2^*(\mathbf{x}, \mathbf{y}) = \frac{1}{2}$  and  $C(G_x, G_y) = -3 \log 3$ . Since the Jensen-Shannon divergence is always non-negative, and zero iff they are equal, we have shown that  $C^* = -3 \log 3$  is the global minimum of  $C(G_x, G_y)$  and that the only solution is  $p(\mathbf{x}, \mathbf{y}) = p_x(\mathbf{x}, \mathbf{y}) = p_y(\mathbf{x}, \mathbf{y})$ , *i.e.*, the generative models perfectly replicating the data distribution.  $\square$

## B $\Delta$ -GAN training procedure

---

**Algorithm 1**  $\Delta$ -GAN training procedure.

---

$\theta_g, \theta_d \leftarrow$  initialize network parameters  
**repeat**  
 $(\mathbf{x}_p^{(1)}, \mathbf{y}_p^{(1)}), \dots, (\mathbf{x}_p^{(M)}, \mathbf{y}_p^{(M)}) \sim p(\mathbf{x}, \mathbf{y})$   $\triangleright$  Get  $M$  paired data samples  
 $\mathbf{x}_u^{(1)}, \dots, \mathbf{x}_u^{(M)} \sim p(\mathbf{x})$   $\triangleright$  Get  $M$  unpaired data samples  
 $\mathbf{y}_u^{(1)}, \dots, \mathbf{y}_u^{(M)} \sim p(\mathbf{y})$   
 $\tilde{\mathbf{x}}_u^{(i)} \sim p_x(\mathbf{x} | \mathbf{y} = \mathbf{y}_u^{(i)}), \quad i = 1, \dots, M$   $\triangleright$  Sample from the conditionals  
 $\tilde{\mathbf{y}}_u^{(j)} \sim p_y(\mathbf{y} | \mathbf{x} = \mathbf{x}_u^{(j)}), \quad j = 1, \dots, M$   
 $\rho_{11}^{(i)} \leftarrow D_1(\mathbf{x}_p^{(i)}, \mathbf{y}_p^{(i)}), \quad i = 1, \dots, M$   $\triangleright$  Compute discriminator predictions  
 $\rho_{12}^{(i)} \leftarrow D_1(\tilde{\mathbf{x}}_u^{(i)}, \mathbf{y}_u^{(i)}), \rho_{13}^{(i)} \leftarrow D_1(\mathbf{x}_u^{(i)}, \tilde{\mathbf{y}}_u^{(i)}), \quad i = 1, \dots, M$   
 $\rho_{21}^{(i)} \leftarrow D_2(\tilde{\mathbf{x}}_u^{(i)}, \mathbf{y}_u^{(i)}), \rho_{22}^{(i)} \leftarrow D_2(\mathbf{x}_u^{(i)}, \tilde{\mathbf{y}}_u^{(i)}), \quad i = 1, \dots, M$   
 $\mathcal{L}_{d_1} \leftarrow -\frac{1}{M} \sum_{i=1}^M \log \rho_{11}^{(i)} - \frac{1}{M} \sum_{j=1}^M \log(1 - \rho_{12}^{(j)}) - \frac{1}{M} \sum_{k=1}^M \log(1 - \rho_{13}^{(k)})$   
 $\mathcal{L}_{d_2} \leftarrow -\frac{1}{M} \sum_{i=1}^M \log \rho_{21}^{(i)} - \frac{1}{M} \sum_{j=1}^M \log(1 - \rho_{22}^{(j)})$   $\triangleright$  Compute discriminator loss  
 $\mathcal{L}_{g_1} \leftarrow -\frac{1}{M} \sum_{i=1}^M \log \rho_{12}^{(i)} - \frac{1}{M} \sum_{j=1}^M \log(1 - \rho_{21}^{(j)})$   $\triangleright$  Compute generator loss  
 $\mathcal{L}_{g_2} \leftarrow -\frac{1}{M} \sum_{i=1}^M \log \rho_{13}^{(i)} - \frac{1}{M} \sum_{j=1}^M \log \rho_{22}^{(j)}$   
 $\theta_d \leftarrow \theta_d - \nabla_{\theta_d}(\mathcal{L}_{d_1} + \mathcal{L}_{d_2})$   $\triangleright$  Gradient update on discriminator networks  
 $\theta_g \leftarrow \theta_g - \nabla_{\theta_g}(\mathcal{L}_{g_1} + \mathcal{L}_{g_2})$   $\triangleright$  Gradient update on generator networks  
**until** convergence

---

## C Additional experimental results

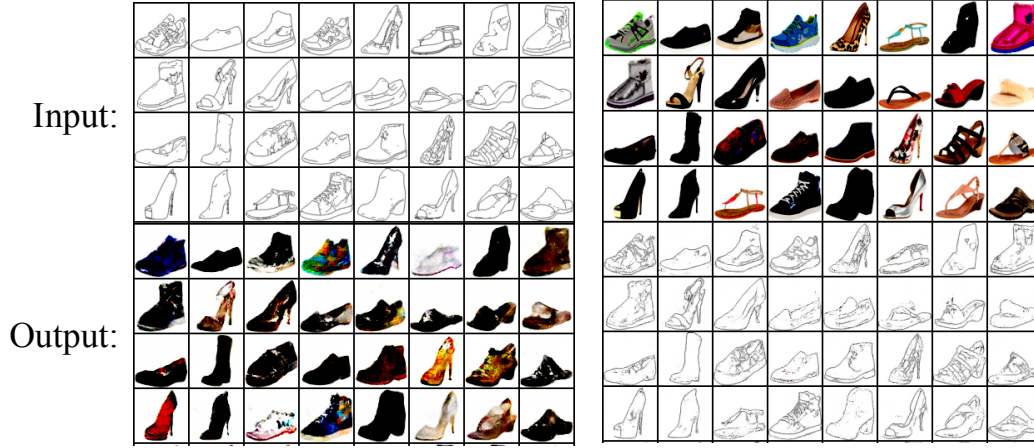

Figure 1: Additional results on the image-to-image translation experiment.

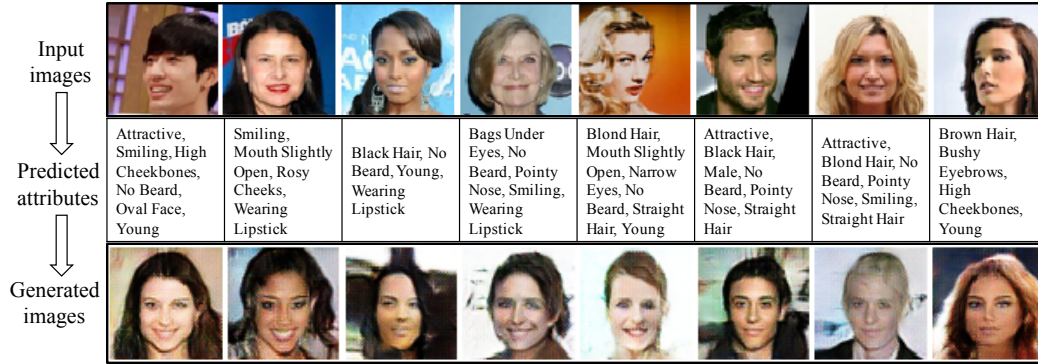

Figure 2: Additional results on the face-to-attribute-to-face experiment.

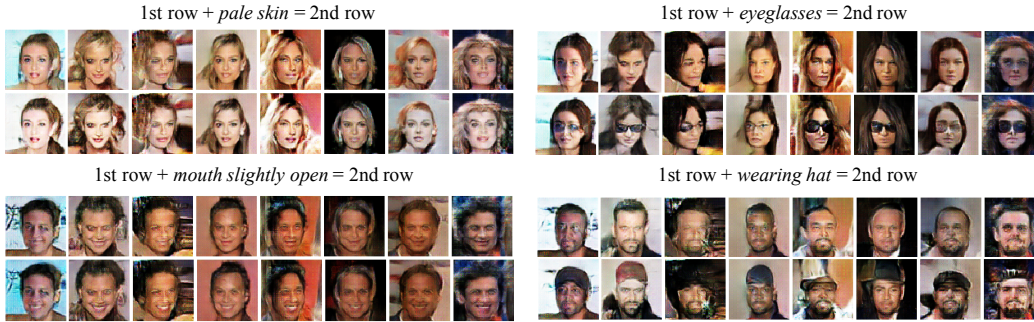

Figure 3: Additional results on the image editing experiment.

| Input | Predicted attributes                                                                                         | Generated images | Input | Predicted attributes                                                                                                                            | Generated images |
|-------|--------------------------------------------------------------------------------------------------------------|------------------|-------|-------------------------------------------------------------------------------------------------------------------------------------------------|------------------|
|       | Building, standing, tall, castle, city, top, object, outdoor, tower                                          |                  |       | airport, airplane, cloudy, large, tarmac, parked, jet, commercial, white, gear, plane, field, flying, landing, aircraft, runway, air, transport |                  |
|       | furniture, sitting, small, room, living, white, hotel, indoor, table, photo, rug, decorated, window, cabinet |                  |       | mammal, standing, animal, field, walking, outdoor, grass                                                                                        |                  |
|       | kite, people, young, blue, boy, standing, playing, colorful, child, air, outdoor, holding, girl, flying      |                  |       | large, red, street, parking, standing, next, decker, tall, train, parked, city, outdoor, transport, tour, road                                  |                  |

Figure 4: Additional results on the image-to-attribute-to-image experiment.

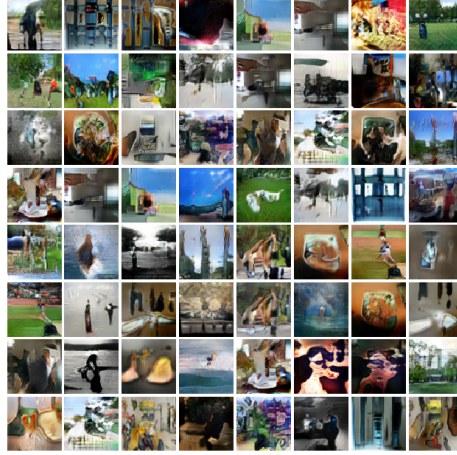

Figure 5: Attribute-conditional image generation on the COCO dataset. Input attributes are omitted for brevity.

Table 1: Results of P@5 and nDCG@5 for attribute predicting on CelebA and COCO.

| Dataset       | CelebA      |             |             | COCO        |             |             |
|---------------|-------------|-------------|-------------|-------------|-------------|-------------|
| Method        | 1%          | 10%         | 100%        | 10%         | 50%         | 100%        |
| Triple GAN    | 49.35/52.73 | 73.68/74.55 | 80.89/78.58 | 38.98/41.00 | 41.08/43.50 | 43.18/46.00 |
| $\Delta$ -GAN | 59.55/60.53 | 74.06/75.49 | 80.39/79.41 | 41.51/43.55 | 44.42/46.40 | 47.32/49.24 |

Table 2: Results of P@3 and nDCG@3 for attribute predicting on CelebA and COCO.

| Dataset       | CelebA      |             |             | COCO        |             |             |
|---------------|-------------|-------------|-------------|-------------|-------------|-------------|
| Method        | 1%          | 10%         | 100%        | 10%         | 50%         | 100%        |
| Triple GAN    | 55.30/56.87 | 76.09/75.44 | 83.54/84.74 | 42.23/43.60 | 45.35/46.85 | 48.47/50.10 |
| $\Delta$ -GAN | 62.62/62.72 | 76.04/76.27 | 84.81/86.85 | 45.45/46.56 | 48.19/49.29 | 50.92/52.02 |

## D Evaluation metrics for multi-label classification

**Precision@ $k$**  Precision at  $k$  is a popular evaluation metric for multi-label classification problems. Given the ground truth label vector  $\mathbf{y} \in \{0, 1\}^L$  and the prediction  $\hat{\mathbf{y}} \in [0, 1]^L$ ,  $P@k$  is defined as

$$P@k := \frac{1}{k} \sum_{l \in \text{rank}_k(\hat{\mathbf{y}})} y^{(l)}.$$

Precision at  $k$  performs evaluation that counts the fraction of correct predictions in the top  $k$  scoring labels.

**nDCG@ $k$**  normalized Discounted Cumulative Gain (nDCG) at rank  $k$  is a family of ranking measures widely used in multi-label learning. DCG is the total gain accumulated at a particular rank  $p$ , which is defined as

$$DCG@k := \sum_{l \in \text{rank}_k(\hat{\mathbf{y}})} \frac{y^{(l)}}{\log(l+1)}.$$

Then normalizing DCG by the value at rank  $k$  of the ideal ranking gives

$$N@k := \frac{DCG@k}{\sum_{l=1}^{\min(k, \|\mathbf{y}\|_0)} \frac{1}{\log(l+1)}}.$$

## E Detailed network architectures

For the CIFAR10 dataset, we use the same network architecture as used in Triple GAN [2]. For the edges2shoes dataset, we use the same network architecture as used in the pix2pix paper [3]. For other datasets, we provide the detailed network architectures below.

Table 3: Architecture of the models for  $\Delta$ -GAN on MNIST. BN denotes batch normalization.

| Generator A to B                                                                                                                                                                         | Generator B to A                                                                                                                                                                         | Discriminator                                                                                                                                                              |
|------------------------------------------------------------------------------------------------------------------------------------------------------------------------------------------|------------------------------------------------------------------------------------------------------------------------------------------------------------------------------------------|----------------------------------------------------------------------------------------------------------------------------------------------------------------------------|
| Input $28 \times 28$ Gray Image                                                                                                                                                          | Input $28 \times 28$ Gray Image                                                                                                                                                          | Input two $28 \times 28$ Gray Image                                                                                                                                        |
| $5 \times 5$ conv. 32 ReLU, stride 2, BN<br>$5 \times 5$ conv. 64 ReLU, stride 2, BN<br>$5 \times 5$ conv. 128 ReLU, stride 2, BN<br>Dropout: 0.1<br>MLP output $28 \times 28$ , sigmoid | $5 \times 5$ conv. 32 ReLU, stride 2, BN<br>$5 \times 5$ conv. 64 ReLU, stride 2, BN<br>$5 \times 5$ conv. 128 ReLU, stride 2, BN<br>Dropout: 0.1<br>MLP output $28 \times 28$ , sigmoid | $5 \times 5$ conv. 32 ReLU, stride 2, BN<br>$5 \times 5$ conv. 64 ReLU, stride 2, BN<br>$5 \times 5$ conv. 128 ReLU, stride 2, BN<br>Dropout: 0.1<br>MLP output 1, sigmoid |

Table 4: Architecture of the models for  $\Delta$ -GAN on CelebA. BN denotes batch normalization. lReLU denotes Leaky ReLU.

| Generator A to B                                                                                                                                                                                                                                                                    | Generator B to A                                                                                                                                                                                                                                                                      | Discriminator                                                                                                                                                                                                                        |
|-------------------------------------------------------------------------------------------------------------------------------------------------------------------------------------------------------------------------------------------------------------------------------------|---------------------------------------------------------------------------------------------------------------------------------------------------------------------------------------------------------------------------------------------------------------------------------------|--------------------------------------------------------------------------------------------------------------------------------------------------------------------------------------------------------------------------------------|
| Input $64 \times 64 \times 3$ Image                                                                                                                                                                                                                                                 | Input $1 \times 40$ attributes, $1 \times 100$ noise                                                                                                                                                                                                                                  | Input $64 \times 64$ Image and $1 \times 40$ attributes                                                                                                                                                                              |
| $4 \times 4$ conv. 32 lReLU, stride 2, BN<br>$4 \times 4$ conv. 64 lReLU, stride 2, BN<br>$4 \times 4$ conv. 128 lReLU, stride 2, BN<br>$4 \times 4$ conv. 256 lReLU, stride 2, BN<br>$4 \times 4$ conv. 512 lReLU, stride 2, BN<br>MLP output 512, lReLU<br>MLP output 40, sigmoid | concat input<br>MLP output 1024, lReLU, BN<br>MP output 8192, lReLU, BN<br>concat attributes<br>$5 \times 5$ deconv. 256 ReLU, stride 2, BN<br>$5 \times 5$ deconv. 128 ReLU, stride 2, BN<br>$5 \times 5$ deconv. 64 ReLU, stride 2, BN<br>$5 \times 5$ deconv. 3 tanh, stride 2, BN | concat two inputs<br>$5 \times 5$ conv. 64 ReLU, stride 2, BN<br>$5 \times 5$ conv. 128 ReLU, stride 2, BN<br><br>$5 \times 5$ conv. 256 ReLU, stride 2, B<br>$5 \times 5$ conv. 512 ReLU, stride 2, BN<br><br>MLP output 1, sigmoid |

Table 5: Architecture of the models for  $\Delta$ -GAN on COCO. BN denotes batch normalization. lReLU denotes Leaky ReLU. *Dim* denotes the number of attributes.

| Generator A to B                                                                                                                                                                                                                                                                                                                                              | Generator B to A                                                                                                                                                                                                                                                                                                                                                                                                        | Discriminator                                                                                                                                                                                                                                             |
|---------------------------------------------------------------------------------------------------------------------------------------------------------------------------------------------------------------------------------------------------------------------------------------------------------------------------------------------------------------|-------------------------------------------------------------------------------------------------------------------------------------------------------------------------------------------------------------------------------------------------------------------------------------------------------------------------------------------------------------------------------------------------------------------------|-----------------------------------------------------------------------------------------------------------------------------------------------------------------------------------------------------------------------------------------------------------|
| Input $64 \times 64 \times 3$ Image                                                                                                                                                                                                                                                                                                                           | Input $1 \times 40$ attributes, $1 \times 100$ noise                                                                                                                                                                                                                                                                                                                                                                    | Input $64 \times 64$ Image and $1 \times Dim$ attributes                                                                                                                                                                                                  |
| $4 \times 4$ conv. 32 lReLU, stride 2, BN<br>$4 \times 4$ conv. 64 lReLU, stride 2, BN<br>$4 \times 4$ conv. 128 lReLU, stride 2, BN<br>$4 \times 4$ conv. 256 lReLU, stride 2, BN<br>$4 \times 4$ conv. 512 lReLU, stride 2, BN<br><br>ResNet Block<br><br>$1 \times 1$ conv. 512 lReLU, stride 1, BN<br><br>$4 \times 4$ conv. <i>Dim</i> sigmoid, stride 4 | concat inputs<br>MLP output 16384, BN<br>ResNet Block<br>$4 \times 4$ deconv. 512, stride 2<br>$3 \times 3$ conv. 512, stride 1, BN<br>ResNet Block<br>$4 \times 4$ deconv. 256, stride 2<br>$3 \times 3$ conv. 256, stride 1, BN<br>$4 \times 4$ deconv. 128 ReLU, stride 2<br>$3 \times 3$ conv. 128 ReLU, stride 1, BN<br>$4 \times 4$ deconv. <i>Dim</i> , stride 2<br>$3 \times 3$ conv. <i>Dim</i> tanh, stride 1 | concat conditional inputs<br><br>$5 \times 5$ conv. 64 ReLU, stride 2, BN<br><br>$5 \times 5$ conv. 128 ReLU, stride 2, BN<br><br>$5 \times 5$ conv. 256 ReLU, stride 2, BN<br><br>$5 \times 5$ conv. 512 ReLU, stride 2, BN<br><br>MLP output 1, sigmoid |

## References

- [1] Ian Goodfellow, Jean Pouget-Abadie, Mehdi Mirza, Bing Xu, David Warde-Farley, Sherjil Ozair, Aaron Courville, and Yoshua Bengio. Generative adversarial nets. In *NIPS*, 2014.
- [2] Chongxuan Li, Kun Xu, Jun Zhu, and Bo Zhang. Triple generative adversarial nets. In *NIPS*, 2017.
- [3] Phillip Isola, Jun-Yan Zhu, Tinghui Zhou, and Alexei A Efros. Image-to-image translation with conditional adversarial networks. In *CVPR*, 2017.
